# Supplementary material
Source: publisher site journal article supplement (https://www.spandidos-publications.com/7990/downloadSupplementary)
Supplement: Supplementary file 1 [file downloadSupplementary]

## Sheet: Table SI
Table SI. Sequences of the siRNAs used in the present study.
Gene	Sense sequences (5’-3’)	Anti-sense sequences (5’-3’)
NEAT1 si1	GCCAUCAGCUUUGAAUAAATT	UUUAUUCAAAGCUGAUGGCTT
NEAT1 si2	UGGCUAGCUCAGGGCUUCAG	CUGAAGCCCUGAGCUAGCCA
siLDHB	ACUGCCAAUUCUAAGAUUG	CAAUCUUAGAAUUGGCAGU
siAARS1	CGAUGUCCAGAAACGAGUGUUTT	AACACUCGUUUCUGGACAUCGTT
siAARS2	CCAUCAUACCUUCUUUGAAAUTT	AUUUCAAAGAAGGUAUGAUGGTT
siCBP	CCCGAUAACUUUGUGAUGUUUTT	AAACAUCACAAAGUUAUCGGGTT
siKAT5	UCGAAUUGUUUGGGCACUGAUTT	AUCAGUGCCCAAACAAUUCGATT
siKAT8	CGAAAUUGAUGCCUGGUAUUUTT	AAAUACCAGGCAUCAAUUUCGTT
siP300	CAAUUCCGAGACAUCUUGAGATT	UCUCAAGAUGUCUCGGAAUUGTT
siSIRT1	GGAUGAAAGUGAAAUUGAATT	UUCAAUUUCACUUUCAUCCTT
siSIRT2	AAUCUCCACAUCCGCAGGCAUTT	AUGCCUGCGGAUGUGGAGAUUTT
siSIRT3	GCGUUGUGAAGCCCGACAUTT	AUGUCGGGCUUCACAACGCTT
siHDAC1	CCCGGAGGAAAGUCUGUUATT	UAACAGACUUUCCUCCGGGTT
siHDAC2	CCCAUAACUUGCUGUUAAATT	UUUAACAGCAAGUUAUGGGTT
siHDAC3	CCUGCAUUACGGUCUCUAUAATT	UUAUAGAGACCGUAAUGCAGGTT
NC	ACUGUUCUAUGACUUGUCGUGAAUA	UAUUCACGACAAGUCAUAGAACAGU
si, small interfering (RNA); NC, negative control; NEAT1, nuclear paraspeckle assembly transcript 1; LDHB, lactate dehydrogenase B; AARS, alany-tRNA synthetase; CBP, CREB binding lysine acetyltransferase; KAT, lysine acetyltransferase; SIRT, sirtuin; HDAC, histone deacetylase.
